# Supplementary material for: Ethylene carbonate as a unique solvent for palladium-catalyzed Wacker oxidation using oxygen as the sole oxidant
Source: Royal Society of Chemistry journal article supplement (doi:10.1039/b913779n), 2009-01-01
Supplement: b913779n.pdf [file b913779n.pdf]

## Electronic Supplementary Information

### Ethylene carbonate as a unique solvent for palladium catalyzed Wacker oxidation using oxygen as the sole oxidant

Jing-Lun Wang, Liang-Nian He\*, Cheng-Xia Miao, Yu-Nong Li

*State Key Laboratory and Institute of Elemento-Organic Chemistry, Nankai University, Tianjin  
300071, P.R. China. Fax: +86 22 2350 4216; Tel: +86 22 2350 4216; E-mail:  
heln@nankai.edu.cn*

#### List of Contents

|                                                                        |    |
|------------------------------------------------------------------------|----|
| (1) General information                                                | S2 |
| (2) Optimizing the reaction conditions                                 | S2 |
| (3) The <sup>1</sup> H NMR and <sup>13</sup> C NMR data for products   | S5 |
| (4) The <sup>1</sup> H NMR and <sup>13</sup> C NMR charts for products | S7 |

## (1) General information

All the alkenes were commercially available and were used without further purification.  $^1\text{H}$  NMR and  $^{13}\text{C}$  NMR spectra were recorded on a Bruker 400 MHz or Bruker 300 MHz, and at 100.4 or 75 MHz respectively in the  $\text{CDCl}_3$ . Chemical shifts ( $\delta$ ) are given in ppm relative to TMS. The solvent signals were used as references and the chemical shifts converted to the TMS scale ( $\text{CDCl}_3$ :  $\delta_{\text{C}}$  77.0 ppm; residual  $\text{CHCl}_3$  in  $\text{CDCl}_3$ :  $\delta_{\text{H}}$  7.26 ppm). Column chromatography was performed by using silica gel 200-300 mesh with ethyl acetate/petroleum (1:20-1:10) as eluent to obtain the desired product. GC analyses were performed on Shimadzu GC-2014, equipped with a capillary column (RTX-5, 30 m  $\times$  0.25  $\mu\text{m}$ ) using a flame ionization detector.

Transmission Electron Microscopic (TEM) Measurements: A 50  $\mu\text{L}$  portion of sample solution was dropped on a copper grid. The grid was then air-dried. The samples were examined by a high-resolution transmission electron microscope (TEM) (Philips Tecnaï G2 20 S-TWIN microscope) operating at an accelerating voltage of 200 keV.

## (2) Optimizing the reaction conditions

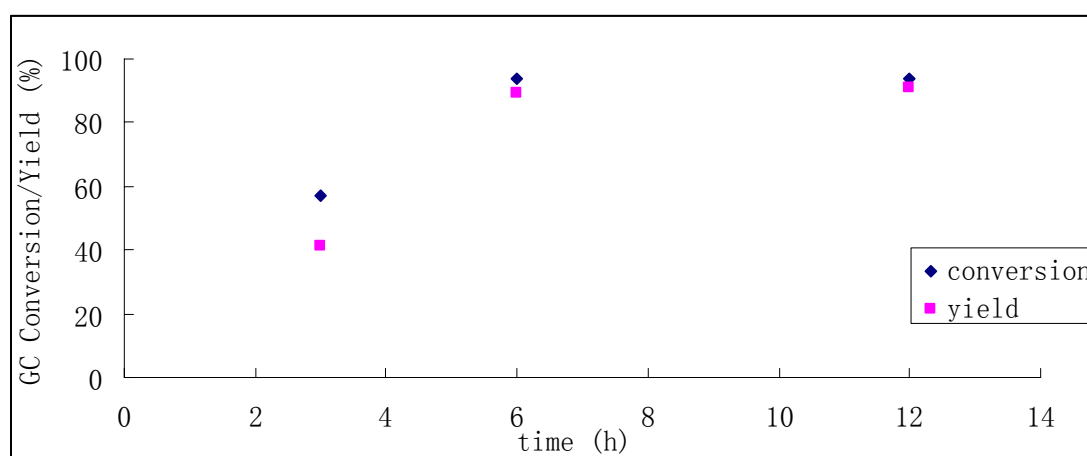

**Figure S1.** Effect of the reaction time on the Wacker oxidation of 1-dodecene in EC.

Reaction conditions: 1-dodecene (0.5 mmol, 0.11 mL),  $\text{PdCl}_2$  (0.01 mmol, 1.77 mg),  $\text{NaOAc}$  (10 mol %, 4.1 mg), EC (3 mL), Temp. 80  $^\circ\text{C}$ ,  $\text{P}_{\text{O}_2}$  (10 atm).

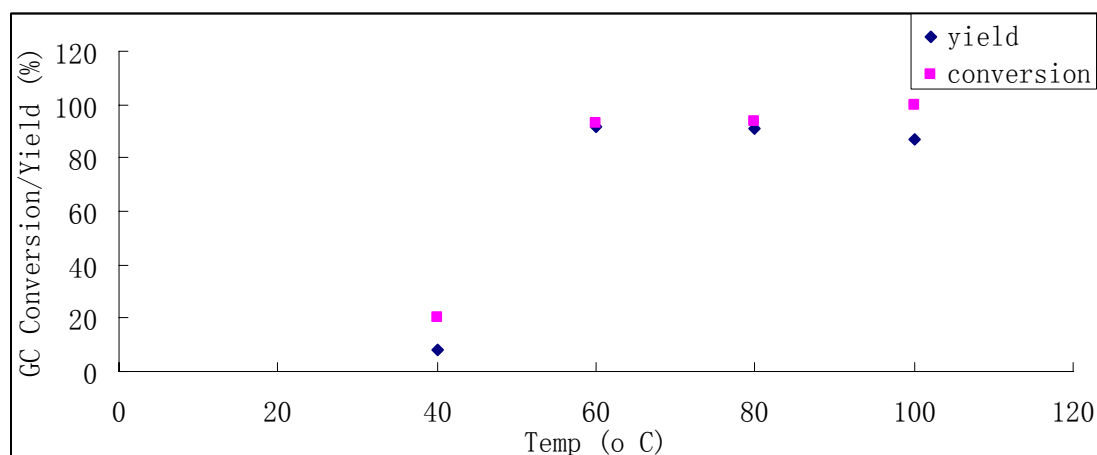

**Figure S2.** Effect of the temperature on the Wacker oxidation of 1-dodecene in EC  
Reaction conditions: dodecene (0.5 mmol, 0.11 mL), PdCl<sub>2</sub> (0.01 mmol, 1.77 mg), NaOAc (10 mol %, 4.1 mg), EC (3 mL), time 12 h, P<sub>O<sub>2</sub></sub> (10 atm).

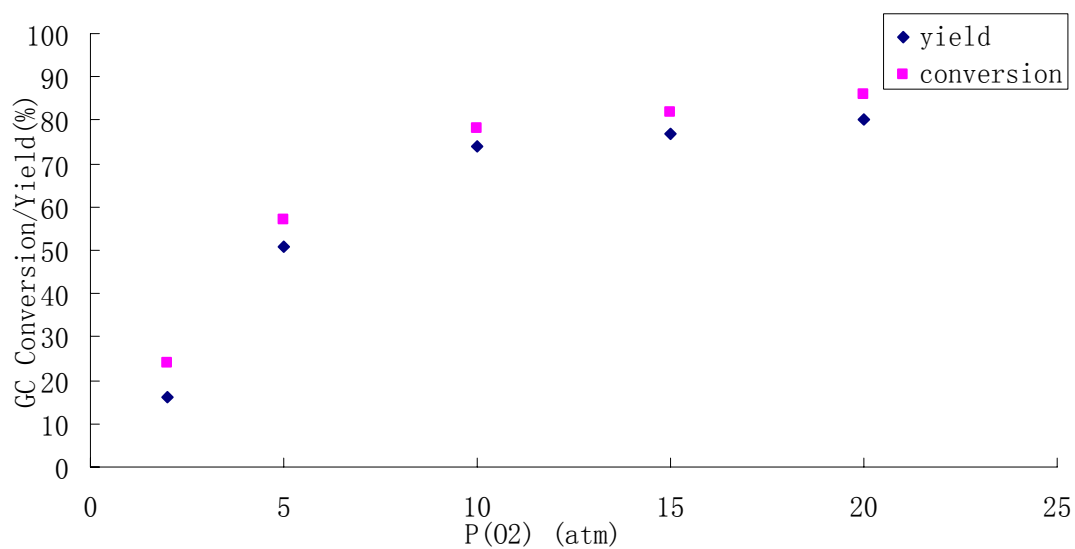

**Figure S3.** Effect of the pressure of O<sub>2</sub> on the Wacker oxidation of 1-dodecene in EC.  
Reaction conditions: 1-dodecene (0.5 mmol, 0.11 mL), PdCl<sub>2</sub> (0.01 mmol, 1.77 mg), EC (3 mL), NaOAc (10 mol %, 4.1 mg), Temp. 60 °C, time 6 h.

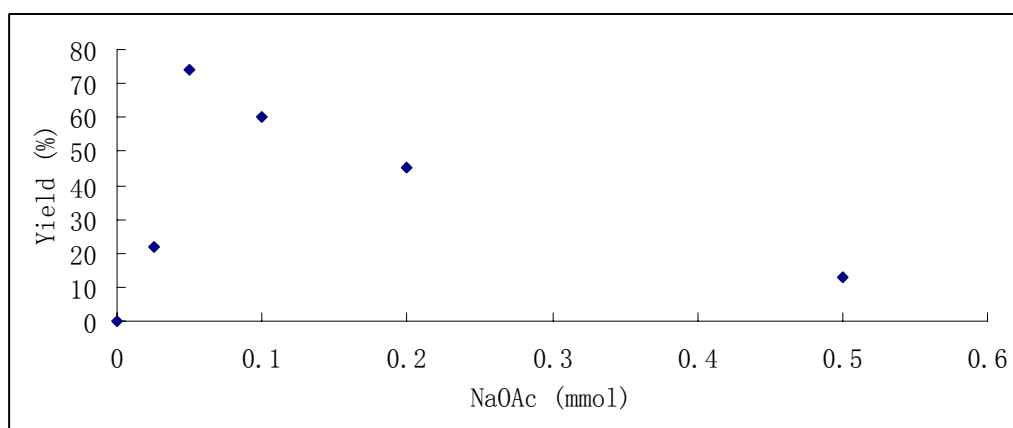

**Figure S4.** Effect of the amount of NaOAc on the Wacker oxidation of 1-dodecene in EC. Reaction conditions: 1-dodecene (0.5 mmol, 0.11 mL), PdCl<sub>2</sub> (0.01 mmol, 1.77 mg), EC (3 mL), Temp. 60 °C, time 6 h, Po<sub>2</sub> (10 atm).

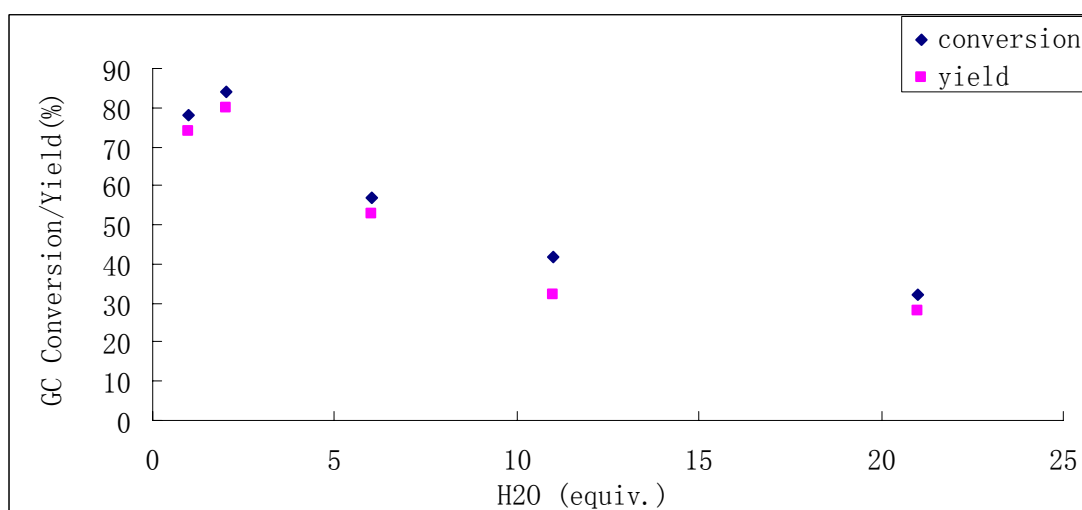

**Figure S5.** Effect of the amount of water on the Wacker oxidation of 1-dodecene in EC. Reaction conditions: dodecene (0.5 mmol, 0.11 mL), PdCl<sub>2</sub> (0.01 mmol), EC (3 mL), NaOAc (10 mol %, 4.1 mg), Temp. 60 °C, time 6 h, Po<sub>2</sub> (10 atm).

**Table S1** Effect of additives on the Wacker oxidation of 1-dodecene in EC

| Entry | Additive                       | Temp. (°C) | Time (h) | Conv. (%) | Yield (%) |
|-------|--------------------------------|------------|----------|-----------|-----------|
| 1     | Pyridine                       | 60         | 6        | 0         | 0         |
| 2     | 1,10-phenanthroline            | 60         | 6        | 3         | 0         |
| 3     | NEt <sub>3</sub>               | 60         | 6        | 0         | 0         |
| 4     | PPh <sub>3</sub>               | 60         | 6        | 0         | 0         |
| 5     | acac                           | 60         | 6        | 14        | 0         |
| 6     | LiOAc                          | 60         | 6        | 23        | 13        |
| 7     | KOAc                           | 60         | 6        | 23        | 2         |
| 8     | KOAc                           | 80         | 6        | 57        | 50        |
| 9     | KOAc                           | 100        | 6        | 80        | 72        |
| 10    | Mg(OAc) <sub>2</sub>           | 60         | 6        | 0         | 0         |
| 11    | K <sub>2</sub> CO <sub>3</sub> | 60         | 6        | 0         | 0         |
| 12    | n-Bu <sub>4</sub> Cl           | 60         | 6        | 0         | 0         |
| 13    | n-Bu <sub>4</sub> NBr          | 60         | 6        | 0         | 0         |

Reaction conditions: dodecene (0.5 mmol, 0.11 mL), PdCl<sub>2</sub> (0.01mmol, 1.77 mg), additive (10 mol %), EC (3 mL), Po<sub>2</sub> (10 atm).

### (3) The <sup>1</sup>H NMR and <sup>13</sup>C NMR data for products

Octan-2-one (**1a**): <sup>1</sup>H NMR(400MHz, CDCl<sub>3</sub>): δ 2.38(t, *J* = 7.2MHz, 2H), 2.10(s, 3H), 1.51-1.55(m, 2H), 1.24 (m, 6H), 0.84(q, *J* = 5.1MHz, 3H); <sup>13</sup>C NMR(100.4MHz, CDCl<sub>3</sub>): δ 209.4, 43.8, 31.6, 29.9, 28.9, 23.9, 22.5, 14.0.

Decan-2-one (**1b**): <sup>1</sup>H NMR(300MHz, CDCl<sub>3</sub>): δ 2.40(t, *J* = 7.4MHz, 2H), 2.11(s, 3H), 1.52-1.57(m, 2H), 1.25 (m, 10H), 0.86(q, *J* = 6.9MHz, 3H); <sup>13</sup>C NMR(75MHz, CDCl<sub>3</sub>): δ 209.2, 43.8, 31.8, 29.8, 29.3, 29.2, 29.1, 23.9, 22.6, 14.0.

Dodecan-2-one (**1c**): <sup>1</sup>H NMR(300MHz, CDCl<sub>3</sub>): δ 2.40(t, *J* = 7.4MHz, 2H), 2.10(s, 3H), 1.52-1.58(m, 2H), 1.24 (m, 14H), 0.86(q, *J* = 6.9MHz, 3H); <sup>13</sup>C NMR(75MHz, CDCl<sub>3</sub>): δ 209.1, 43.8, 31.9, 29.7, 29.5, 29.4, 29.3, 29.2, 29.1, 23.9, 22.6, 14.0.

Hexadecan-2-one (**1d**): <sup>1</sup>H NMR(400MHz, CDCl<sub>3</sub>): δ 2.40(t, *J* = 7.4MHz, 2H), 2.12(s, 3H), 1.54-1.59(m, 2H), 1.24 (m, 22H), 0.86(q, *J* = 6.5MHz, 3H); <sup>13</sup>C NMR(100.4MHz, CDCl<sub>3</sub>): δ 209.5, 43.8, 31.9, 29.9, 29.7, 29.6, 29.6, 29.5, 29.3, 29.2, 23.9, 22.7, 14.0.

Acetophenone (**1e**): <sup>1</sup>H NMR(300MHz, CDCl<sub>3</sub>): δ 7.93 (m, 2H), 7.54(m, 1H), 7.45(m, 2H), 2.57(s, 3H); <sup>13</sup>C NMR(75MHz, CDCl<sub>3</sub>): δ 198.0, 137.2, 133.0, 128.5, 128.3, 26.5.

*p*-Methylacetophenone (**1f**):  $^1\text{H}$  NMR(400MHz,  $\text{CDCl}_3$ ):  $\delta$  7.87 (d,  $J = 8.2\text{MHz}$ , 2H), 7.26 (d,  $J = 8.0\text{MHz}$ , 2H), 2.58 (s, 3H), 2.41 (s, 3H);  $^{13}\text{C}$  NMR(100.4MHz,  $\text{CDCl}_3$ ):  $\delta$  197.8, 143.9, 134.7, 129.2, 128.4, 26.5, 21.6.

*p*-Methoxyacetophenone (**1g**):  $^1\text{H}$  NMR(400MHz,  $\text{CDCl}_3$ ):  $\delta$  7.94 (d,  $J = 8.8\text{MHz}$ , 2H), 6.93 (d,  $J = 8.8\text{MHz}$ , 2H), 3.87 (s, 3H), 2.56 (s, 3H);  $^{13}\text{C}$  NMR(75MHz,  $\text{CDCl}_3$ ):  $\delta$  196.7, 130.6, 113.7, 55.5, 26.3.

*m*-Methylacetophenone (**1h**):  $^1\text{H}$  NMR(300MHz,  $\text{CDCl}_3$ ):  $\delta$  7.68 (m, 2H), 7.28 (m, 2H), 2.52 (s, 3H), 2.30 (s, 3H);  $^{13}\text{C}$  NMR(75MHz,  $\text{CDCl}_3$ ):  $\delta$  197.4, 137.3, 136.1, 132.8, 127.8, 127.4, 124.6, 26.5, 20.3.

*o*-Methylacetophenone (**1i**):  $^1\text{H}$  NMR(300MHz,  $\text{CDCl}_3$ ):  $\delta$  7.46 (m, 4H), 2.58 (s, 3H), 2.540 (s, 3H);  $^{13}\text{C}$  NMR(75MHz,  $\text{CDCl}_3$ ):  $\delta$  200.7, 137.4, 136.7, 131.0, 130.5, 128.3, 124.1, 28.5, 20.5.

*p*-chloroacetophenone (**1j**):  $^1\text{H}$  NMR(300MHz,  $\text{CDCl}_3$ ):  $\delta$  7.88 (d,  $J = 8.4\text{MHz}$ , 2H), 7.42 (d,  $J = 8.4\text{MHz}$ , 2H), 2.58 (s, 3H);  $^{13}\text{C}$  NMR(75MHz,  $\text{CDCl}_3$ ):  $\delta$  196.8, 139.6, 135.4, 129.7, 128.8, 26.6.

#### (4) The $^1\text{H}$ NMR and $^{13}\text{C}$ NMR charts for products

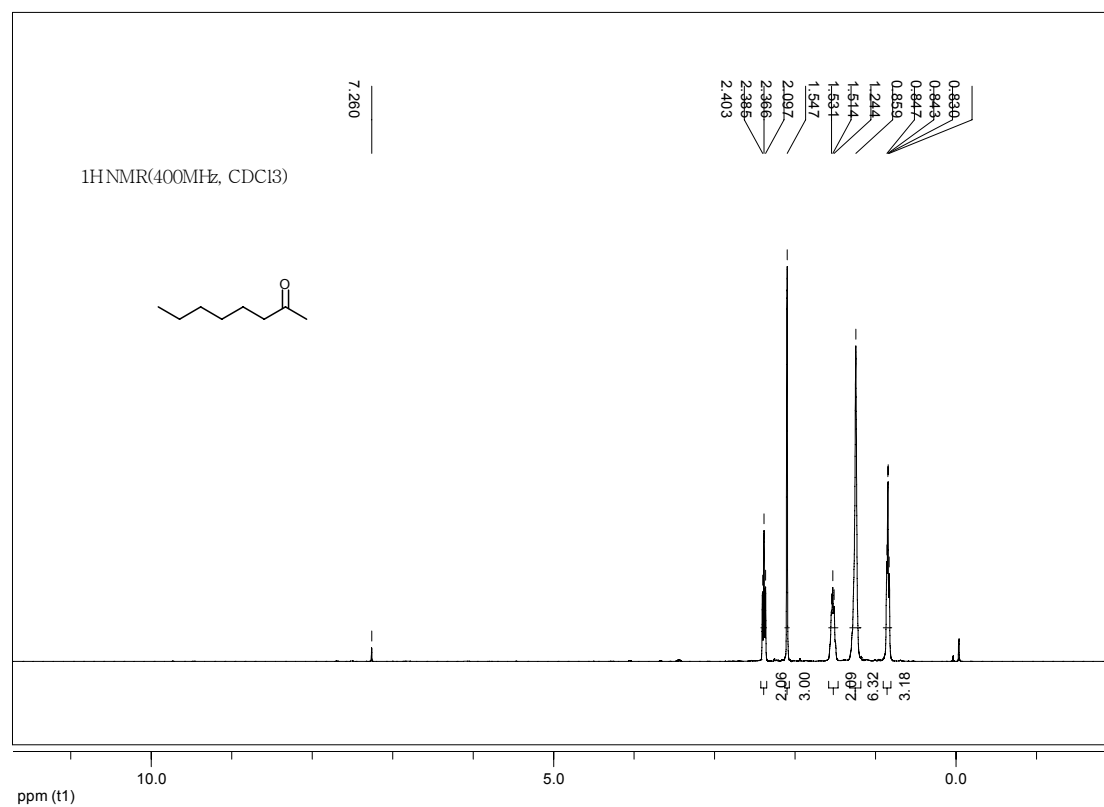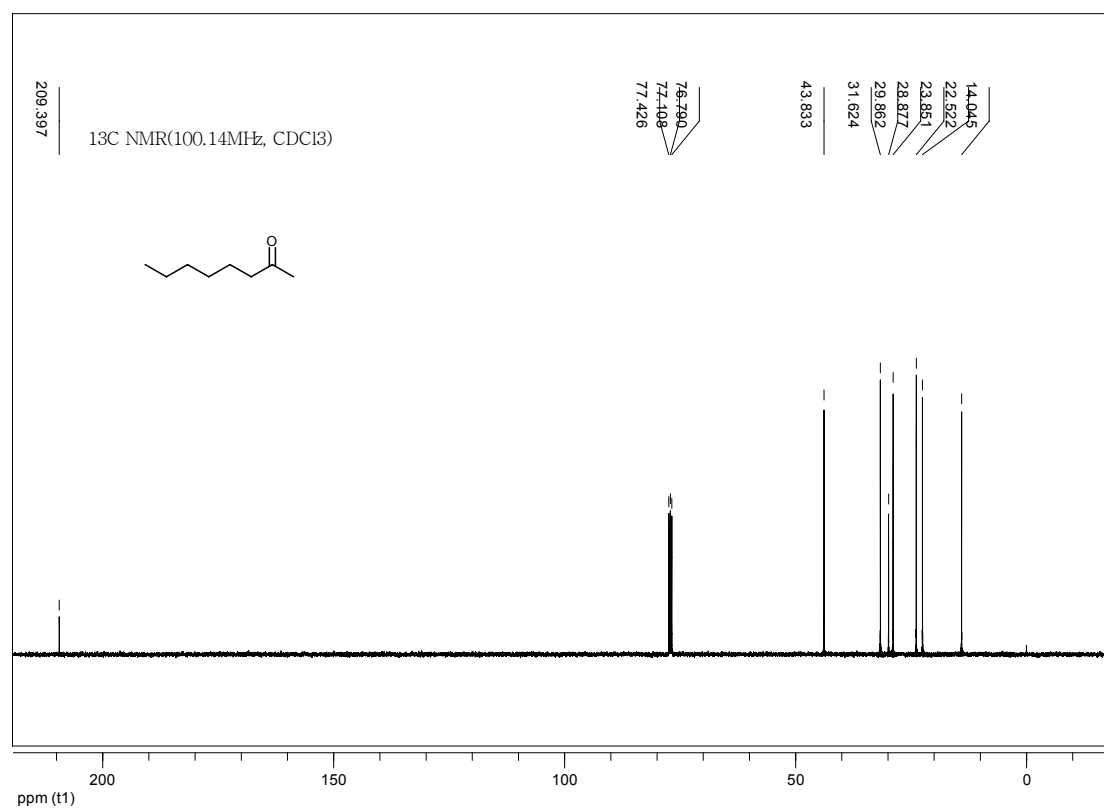

**2a**
